# Supplementary material
Source: Research Square preprint supplement (doi:10.21203/rs.3.rs-9638574/v1)
Supplement: Supplementary file 1 [file 3b66d1b9732773224aca2408.xlsx]

## Sheet: Table 3
Model	AUC	Accuracy	Sensitivity	Specificity	Precision	F1-Score
Day 28 outcome
GBM	0.723	0.681	0.617	0.707	0.462	0.528
Random Forest	0.715	0.697	0.532	0.765	0.479	0.504
SVM	0.714	0.672	0.618	0.693	0.451	0.521
XGBoost	0.71	0.677	0.585	0.714	0.454	0.511
KNN	0.587	0.598	0.561	0.613	0.371	0.447
Day90 outcome
Random Forest	0.709	0.644	0.687	0.615	0.541	0.606
GBM	0.709	0.662	0.585	0.712	0.573	0.579
XGBoost	0.705	0.653	0.687	0.629	0.55	0.611
SVM	0.7	0.633	0.675	0.605	0.53	0.594
KNN	0.562	0.568	0.533	0.591	0.462	0.495
Day 180 outcome
GBM	0.725	0.651	0.739	0.578	0.593	0.658
Random Forest	0.72	0.638	0.822	0.485	0.571	0.674
SVM	0.717	0.641	0.807	0.502	0.574	0.671
XGBoost	0.699	0.631	0.762	0.522	0.57	0.652
KNN	0.574	0.571	0.613	0.536	0.523	0.564
