# Supplementary material
Source: Research Square preprint supplement (doi:10.21203/rs.3.rs-9638574/v1)
Supplement: Supplementary file 2 [file b94e0452e3f553fc0924ab82.xlsx]

## Sheet: Sheet2
Outcome	Model 1		Model 2		Model 3
	HR (95% CI)	P value	HR (95% CI)	P value	HR (95% CI)	P value
MIMICIV
Day 28 outcome
Q 2 vs Q 1	1.19 (0.98–1.44)	0.08	1.20 (0.99–1.46)	0.06	1.22 (1.00–1.48)	< 0.05
Q 3 vs Q 1	1.72 (1.44–2.06)	< 0.05	1.79 (1.50–2.15)	< 0.05	1.70 (1.40–2.05)	< 0.05
Q 4 vs Q 1	2.58 (2.18–3.06)	< 0.05	2.83 (2.38–3.36)	< 0.05	2.37 (1.95–2.87)	< 0.05
Day 90 outcome
Q 2 vs Q 1	1.09 (0.94–1.28)	0.26	1.11 (0.95–1.30)	0.19	1.13 (0.96–1.32)	0.14
Q 3 vs Q 1	1.56 (1.35–1.81)	< 0.05	1.64 (1.41–1.90)	< 0.05	1.56 (1.33–1.82)	< 0.05
Q 4 vs Q 1	2.17 (1.89–2.50)	< 0.05	2.41 (2.09–2.78)	< 0.05	2.06 (1.75–2.42)	< 0.05
Day 180 outcome
Q 2 vs Q 1	1.14 (0.99–1.31)	0.08	1.16 (1.00–1.34)	< 0.05	1.16 (1.00–1.35)	< 0.05
Q 3 vs Q 1	1.53 (1.33–1.75)	< 0.05	1.60 (1.39–1.83)	< 0.05	1.51 (1.30–1.75)	< 0.05
Q 4 vs Q 1	2.09 (1.83–2.39)	< 0.05	2.32 (2.03–2.66)	< 0.05	1.98 (1.70–2.31)	< 0.05
MIMIC-III-CareVue
Day 28 outcome
Q 2 vs Q 1	1.58 (0.94–2.66)	0.09	1.47 (0.87–2.49)	0.14	1.39 (0.78–2.48)	0.26
Q 3 vs Q 1	2.28 (1.33–3.90)	< 0.05	2.14 (1.25–3.68)	< 0.05	1.87 (1.00–3.49)	0.05
Q 4 vs Q 1	6.17 (3.77–10.11)	< 0.05	5.94 (3.61–9.79)	< 0.05	3.62 (1.89–6.94)	< 0.05
Day 90 outcome
Q 2 vs Q 1	1.40 (1.05–1.87)	< 0.05	1.37 (1.03–1.83)	< 0.05	1.33 (0.98–1.81)	0.07
Q 3 vs Q 1	1.38 (1.03–1.85)	< 0.05	1.45 (1.07–1.95)	< 0.05	1.49 (1.08–2.06)	< 0.05
Q 4 vs Q 1	1.69 (1.29–2.23)	< 0.05	1.95 (1.47–2.58)	< 0.05	1.63 (1.16–2.28)	< 0.05
Day 180 outcome
Q 2 vs Q 1	1.40 (1.07–1.82)	< 0.05	1.36 (1.04–1.77)	< 0.05	1.29 (0.97–1.72)	0.08
Q 3 vs Q 1	1.28 (0.98–1.69)	0.07	1.35 (1.02–1.78)	< 0.05	1.38 (1.02–1.86)	< 0.05
Q 4 vs Q 1	1.69 (1.31–2.18)	< 0.05	1.94 (1.50–2.52)	< 0.05	1.65 (1.21–2.26)	< 0.05
