# Supplementary material
Source: Research Square preprint supplement (doi:10.21203/rs.3.rs-9638574/v1)
Supplement: Supplementary file 3 [file fb7bdb9ea219fd7126e8b17e.xlsx]

## Sheet: Sheet1
Variable	Overall	Q1	Q2	Q3	Q4	P value
	(N=4000)	(N=1000)	(N=1000)	(N=1000)	(N=1000)
Age, y	73.00 [63.00, 81.00]	74.00 [64.00, 82.00]	73.00 [63.00, 82.00]	73.00 [64.00, 81.00]	72.00 [62.00, 80.00]	<0.01
Gender (Female), (%)	1610 (40.25%)	499 (49.90%)	427 (42.70%)	358 (35.80%)	326 (32.60%)	<0.001
Race, (%)
Asian	118 (2.95%)	21 (2.10%)	19 (1.90%)	35 (3.50%)	43 (4.30%)	<0.001
Black	519 (12.97%)	128 (12.80%)	123 (12.30%)	140 (14.00%)	128 (12.80%)
Other	717 (17.93%)	154 (15.40%)	162 (16.20%)	163 (16.30%)	238 (23.80%)
White	2646 (66.15%)	697 (69.70%)	696 (69.60%)	662 (66.20%)	591 (59.10%)
Severity of illness
SOFA	6.00 [4.00, 9.00]	5.00 [3.00, 7.00]	5.00 [4.00, 8.00]	7.00 [5.00, 9.00]	9.00 [6.00, 12.00]	<0.001
OASIS	34.00 [28.00, 40.00]	33.00 [27.00, 39.00]	33.00 [27.00, 39.00]	34.00 [28.00, 41.00]	37.00 [30.00, 43.00]	<0.001
Charlson	7.00 [6.00, 9.00]	7.00 [5.00, 9.00]	7.00 [6.00, 9.00]	8.00 [6.00, 9.00]	8.00 [6.00, 9.00]	<0.001
Comorbidities
Hypertension, (%)	581 (14.53%)	228 (22.80%)	133 (13.30%)	98 (9.80%)	122 (12.20%)	<0.001
Diabetes, (%)	1754 (43.85%)	405 (40.50%)	433 (43.30%)	471 (47.10%)	445 (44.50%)	<0.05
COPD, (%)	596 (14.90%)	186 (18.60%)	142 (14.20%)	136 (13.60%)	132 (13.20%)	<0.01
Sepsis, (%)	2846 (71.15%)	670 (67.00%)	679 (67.90%)	722 (72.20%)	775 (77.50%)	<0.001
Stroke, (%)	224 (5.60%)	64 (6.40%)	61 (6.10%)	46 (4.60%)	53 (5.30%)	0.29
AMI, (%)	857 (21.43%)	141 (14.10%)	202 (20.20%)	228 (22.80%)	286 (28.60%)	<0.001
CHD, (%)	1307 (32.67%)	275 (27.50%)	331 (33.10%)	357 (35.70%)	344 (34.40%)	<0.001
AF, (%)	2192 (54.80%)	540 (54.00%)	556 (55.60%)	540 (54.00%)	556 (55.60%)	0.79
Vital signs
MAP, mmHg	56.00 [49.00, 63.00]	57.00 [50.00, 64.00]	57.00 [50.00, 63.00]	57.00 [49.75, 64.00]	56.00 [48.00, 63.00]	<0.05
Heart rate, beats/min	103.00 [89.00, 121.00]	105.00 [90.00, 122.00]	102.00 [88.00, 120.00]	101.00 [87.00, 118.00]	104.00 [90.00, 122.00]	<0.001
Respiratory rate, times/min	29.00 [25.00, 33.00]	29.00 [25.00, 33.00]	28.00 [25.00, 33.00]	29.00 [25.00, 33.00]	30.00 [26.00, 34.00]	<0.05
Temperature, °C	37.11 [36.89, 37.67]	37.17 [36.89, 37.60]	37.11 [36.89, 37.61]	37.11 [36.83, 37.61]	37.14 [36.89, 37.78]	0.18
Laboratory
Hb, g/dL	9.80 [8.30, 11.60]	9.80 [8.40, 11.50]	10.00 [8.50, 11.70]	9.80 [8.30, 11.60]	9.70 [8.10, 11.70]	0.15
Wbc, 10^9/L	11.40 [8.10, 16.50]	11.80 [8.50, 16.40]	10.90 [7.90, 15.60]	11.30 [7.90, 16.30]	11.70 [7.90, 17.62]	<0.01
ALT, U/L	28.00 [15.00, 70.00]	20.00 [12.00, 36.00]	23.00 [14.00, 45.25]	30.00 [17.00, 65.00]	63.00 [23.00, 337.25]	<0.001
AST, U/L	42.00 [24.00, 108.00]	27.00 [18.00, 43.00]	34.00 [23.00, 66.00]	50.00 [28.00, 103.00]	126.00 [44.00, 558.50]	<0.001
Tbi, mg/dL	0.70 [0.40, 1.30]	0.60 [0.30, 0.90]	0.70 [0.40, 1.20]	0.80 [0.40, 1.40]	1.10 [0.60, 2.10]	<0.001
Alb, g/dL	3.10 [2.70, 3.50]	3.10 [2.68, 3.50]	3.20 [2.80, 3.50]	3.10 [2.70, 3.50]	3.00 [2.60, 3.40]	<0.001
INR	1.50 [1.20, 2.00]	1.30 [1.20, 1.70]	1.40 [1.20, 2.00]	1.50 [1.20, 2.00]	1.60 [1.30, 2.40]	<0.001
PT, seconds	15.85 [13.40, 22.02]	14.70 [13.00, 18.92]	15.30 [13.20, 21.40]	16.20 [13.50, 22.00]	17.90 [14.30, 25.60]	<0.001
APTT, seconds	33.70 [28.80, 43.92]	31.90 [28.17, 38.23]	32.80 [28.20, 42.23]	34.50 [29.20, 45.42]	36.20 [30.10, 51.30]	<0.001
Blood Gas
Lactate,mmol/L	1.80 [1.20, 2.70]	1.50 [1.10, 2.10]	1.60 [1.20, 2.40]	1.80 [1.20, 2.60]	2.40 [1.50, 4.10]	<0.001
PO2,mmHg	90.00 [60.00, 148.00]	88.00 [60.00, 147.00]	94.00 [64.00, 155.00]	86.00 [58.00, 143.00]	90.00 [58.00, 143.00]	<0.05
PCO2,mmHg	40.00 [34.00, 50.00]	42.00 [35.00, 54.00]	42.00 [35.00, 52.00]	40.00 [34.00, 49.25]	38.00 [31.00, 46.00]	<0.001
Na, mmol/L	138.00 [134.00, 141.00]	138.00 [134.00, 141.00]	138.00 [134.00, 141.00]	137.00 [133.75, 140.00]	137.00 [133.00, 141.00]	<0.001
K, mmol/L	4.30 [3.90, 4.90]	4.10 [3.70, 4.60]	4.30 [3.80, 4.80]	4.40 [3.90, 5.00]	4.50 [4.00, 5.20]	<0.001
Ca, mg/dL	8.40 [7.90, 8.90]	8.50 [8.00, 9.00]	8.50 [8.00, 8.90]	8.40 [8.00, 8.90]	8.20 [7.70, 8.80]	<0.001
Cl, mmol/L	102.00 [97.00, 106.00]	102.00 [97.00, 106.00]	102.00 [97.00, 106.00]	101.00 [97.00, 106.00]	101.00 [96.00, 106.00]	0.11
EASIX
LDH, U/L	318.17 [234.00, 494.12]	231.00 [187.00, 291.25]	285.00 [227.00, 366.00]	355.00 [269.00, 482.75]	665.62 [395.62, 1438.25]	<0.001
Plt, 10^9/L	185.08 [132.00, 252.37]	266.42 [204.00, 340.75]	195.40 [153.50, 246.69]	165.00 [123.38, 220.00]	124.50 [73.88, 176.75]	<0.001
Cre, mg/dL	1.80 [1.30, 2.62]	1.27 [1.02, 1.60]	1.65 [1.30, 2.20]	2.18 [1.58, 3.01]	2.56 [1.80, 3.87]	<0.001
EASIX	3.56 [1.85, 7.57]	1.25 [0.90, 1.54]	2.57 [2.19, 2.98]	4.94 [4.19, 5.96]	15.47 [9.93, 30.67]	<0.001
Log2(EASIX)	1.83 [0.89, 2.92]	0.32 [-0.16, 0.62]	1.36 [1.13, 1.58]	2.30 [2.07, 2.58]	3.95 [3.31, 4.94]	<0.001
Interventions
Mechanical_ventilation, (%)	1590 (39.75%)	345 (34.50%)	384 (38.40%)	390 (39.00%)	471 (47.10%)	<0.001
RRT, (%)	187 (4.67%)	8 (0.80%)	16 (1.60%)	48 (4.80%)	115 (11.50%)	<0.001
Vaso, (%)	1671 (41.77%)	361 (36.10%)	392 (39.20%)	411 (41.10%)	507 (50.70%)	<0.001
Outcome
28-day Survival Time (days)	28.00 [20.26, 28.00]	28.00 [28.00, 28.00]	28.00 [28.00, 28.00]	28.00 [17.61, 28.00]	28.00 [8.76, 28.00]	<0.001
Day28outcome, (%)	1157 (28.93%)	197 (19.70%)	229 (22.90%)	313 (31.30%)	418 (41.80%)	<0.001
90-day Survival Time (days)	90.00 [20.26, 90.00]	90.00 [47.45, 90.00]	90.00 [38.79, 90.00]	90.00 [17.61, 90.00]	66.70 [8.76, 90.00]	<0.001
Day90outcome, (%)	1590 (39.75%)	307 (30.70%)	328 (32.80%)	430 (43.00%)	525 (52.50%)	<0.001
180-day Survival Time (days)	180.00 [20.26, 180.00]	180.00 [47.45, 180.00]	180.00 [38.79, 180.00]	180.00 [17.61, 180.00]	66.70 [8.76, 180.00]	<0.001
Day180outcome, (%)	1817 (45.42%)	358 (35.80%)	397 (39.70%)	484 (48.40%)	578 (57.80%)	<0.001
